# Supplementary material for: Development of an Assay for Soy Isoflavones in Women’s Hair
Source: MDPI journal article supplement (doi:10.3390/nu14173619), 2022-09-01
Supplement: s1 [file s1]

## Development of an assay for Soy Isoflavones in Women's Hair

Bensaada Souad<sup>1,2</sup>, Raymond Isabelle<sup>1,3</sup>, Breton Malena<sup>1</sup>, Pellegrin Isabelle<sup>1,4</sup>,  
Viallard Jean-François<sup>1,3</sup>, Bennetau-Pelissero Catherine<sup>1,2,5</sup>

1. University of Bordeaux, 33076 Bordeaux, France

2. ARNA, U1212 Inserm, 5320 CNRS, Pharmacy Faculty, 33076 Bordeaux, France

3. CHU Bordeaux, USN B0 - Hôpital Haut Lévéque - 33604 Pessac, France

4. CHU Bordeaux, Laboratory of Immunology and Immunogenetics, Resources Biological Center (CRB), France

5. Bordeaux Sciences Agro, 33175, Gradignan, France

**Abstract:** Soy isoflavones, at adequate dosage, have estrogenic and anti-thyroidal effects in animals and humans that can either be beneficial or adverse, depending on consumers' physiological status. Hence, this study presents the assay of soy isoflavones in hair, aiming to give new information about a person's isoflavones exposure, when health issues related to estrogenic or thyroidal effects are observed. Aqueous or organic extraction procedures following acidic, basic or enzymatic digestions were tested on 60 volunteer's hair samples from a hairdresser and from the clinical trial 2017T2-29. The acidic digestion method was the most efficient regarding isoflavones. A specific inquiry was developed to assess dietary habits of French consumers based on the analysis of 12,707 food labels from France. It was used to check for the reliability of the new assay method. A score for the consumer's exposure to isoflavones was built considering, among other parameters, soy-based diet and foodstuff containing soy as an ingredient, i.e. "hidden-soy". The correlation between this score and isoflavones measurements in hair reached 0.947;  $p < 0.001$ . Therefore, providing that relevant data are considered to assess isoflavones exposure, hair which smoothen daily isoflavones intakes' variations, is a relevant tissue to assess human isoflavones exposure for subsequent health analysis.

**Keywords:** soy isoflavones; consumer exposure; hair samples; dietary inquiry; digestion method

### Abbreviations:

DAI: Daidzein aglucone form

IFS: Isoflavone Food score

GEN: Genistein aglucone form

IHS: Isoflavone Hair score

### Data presented:

Supplementary material S1: Dietary Inquiry Proposed to Volunteers

Supplementary material S2: Matrix used to Calculate IFS and IHS

Supplementary material S3: Evidencing a Questionable Answer to the Food Questionnaire

Supplementary material S4: Pearson Regression Correlation Between Individual Isoflavones and HIS

## Supplementary materials

### Bensaada et al.

#### Supplementary data S1: Dietary Inquiry

##### Subject and study parameters

|                 |                      |                     |                      |
|-----------------|----------------------|---------------------|----------------------|
| Study acronym   | <input type="text"/> | Promotor's name     | <input type="text"/> |
| Subject code    | <input type="text"/> | Inquiry date        | <input type="text"/> |
| Investigator ID | <input type="text"/> | Investigator's name | <input type="text"/> |

##### Hair treatments questionnaire

|                            |                      |                     |                      |                        |                      |
|----------------------------|----------------------|---------------------|----------------------|------------------------|----------------------|
| Sex of the volunteer       | <input type="text"/> | Subject's age       | <input type="text"/> | Casual treatment since | <input type="text"/> |
| Natural colour of the hair | <input type="text"/> | Last colouring      | <input type="text"/> | Casual product used    | <input type="text"/> |
| Shampoo frequency          | <input type="text"/> | Colouring frequency | <input type="text"/> | Last product used      | <input type="text"/> |
| Hair length                | <input type="text"/> | Last perm           | <input type="text"/> | Casual product used    | <input type="text"/> |
| Cutting frequency          | <input type="text"/> | Perm frequency      | <input type="text"/> | Last product used      | <input type="text"/> |

##### Food consumption profile

| Food habits                                    | I eat at home<br>3 times a day                            | I eat in a canteen<br>3 times a day                                                              | I eat in a restaurant<br>3 times a day       | Cooking practices                  | Frequency per week<br>(number of times) |
|------------------------------------------------|-----------------------------------------------------------|--------------------------------------------------------------------------------------------------|----------------------------------------------|------------------------------------|-----------------------------------------|
| <input type="checkbox"/> Omnivorous            | <input type="text"/> 2 times a day                        | <input type="text"/> 2 times a day                                                               | <input type="text"/> 2 times a day           | <input type="text"/> Frying        | <input type="text"/>                    |
| <input type="checkbox"/> Vegetarian            | <input type="text"/> once a day                           | <input type="text"/> once a day                                                                  | <input type="text"/> once a day              | <input type="text"/> Vapor cooking | <input type="text"/>                    |
| <input type="checkbox"/> Lacto-vegetarian      | <input type="text"/> I go to the fast-food<br>once a week | <input type="text"/> I eat in my office                                                          | <input type="text"/> at least once a week    | <input type="text"/> Boilling      | <input type="text"/>                    |
| <input type="checkbox"/> Vegan                 | <input type="text"/> I don't have 3 meals a day           | <input type="text"/> I have snacks all day                                                       | <input type="text"/> I have food supplements | <input type="text"/> Grill         | <input type="text"/>                    |
| <input type="checkbox"/> Flexivegetarian       | <input type="text"/> I am a small-eater                   | <input type="text"/> I am a medium-eater                                                         | <input type="text"/> I am a big-eater        | <input type="text"/> Wok/Oven      | <input type="text"/>                    |
| For how-long have<br>you been on this<br>diet? | <input type="text"/>                                      | If your case is not considered<br>please tell us if you have a<br>specific diet (allergies, ...) | <input type="text"/>                         | Which food supplements             | <input type="text"/>                    |

# Supplementary materials

## Bensaada et al.

### Supplementary data S1: Dietary Inquiry (continued)

#### Consumption of foodstuff based on "plant-milk"

|   |                                                                 |                               |                                       |                                  |                                    |                                      |                                     |                            |                                                                                                                                                                                                                                                                                                                                      |
|---|-----------------------------------------------------------------|-------------------------------|---------------------------------------|----------------------------------|------------------------------------|--------------------------------------|-------------------------------------|----------------------------|--------------------------------------------------------------------------------------------------------------------------------------------------------------------------------------------------------------------------------------------------------------------------------------------------------------------------------------|
| 1 | Do you drink soy-milk?                                          | Which season                  | <input type="text"/> Winter           | <input type="text"/> Spring      | <input type="text"/> Summer        | <input type="text"/> Autumn          | <input type="text"/> All year       | Casual portion size        |                                                                                                                                                                                                                                                                                                                                      |
|   | <input type="text"/> several a day                              | <input type="text"/> everyday | <input type="text"/> sometimes a week | <input type="text"/> once a week | <input type="text"/> < once a week | <input type="text"/> several a month | <input type="text"/> < once a month | <input type="text"/> never | <div> <input type="text"/> 1/2           <input type="text"/> spoon         </div> <div> <input type="text"/> 1           <input type="text"/> glass         </div> <div> <input type="text"/> 2           <input type="text"/> bowl         </div> <div> <input type="text"/> 3           <input type="text"/> plate         </div> |
| 2 | Do you eat soy-yogurts?                                         | Which season                  | <input type="text"/> Winter           | <input type="text"/> Spring      | <input type="text"/> Summer        | <input type="text"/> Autumn          | <input type="text"/> All year       | Casual portion size        |                                                                                                                                                                                                                                                                                                                                      |
|   | <input type="text"/> several a day                              | <input type="text"/> everyday | <input type="text"/> sometimes a week | <input type="text"/> once a week | <input type="text"/> < once a week | <input type="text"/> several a month | <input type="text"/> < once a month | <input type="text"/> never | <div> <input type="text"/> 1/2           <input type="text"/> spoon         </div> <div> <input type="text"/> 1           <input type="text"/> glass         </div> <div> <input type="text"/> 2           <input type="text"/> bowl         </div> <div> <input type="text"/> 3           <input type="text"/> plate         </div> |
| 3 | Do you eat soy-cream?                                           | Which season                  | <input type="text"/> Winter           | <input type="text"/> Spring      | <input type="text"/> Summer        | <input type="text"/> Autumn          | <input type="text"/> All year       | Casual portion size        |                                                                                                                                                                                                                                                                                                                                      |
|   | <input type="text"/> several a day                              | <input type="text"/> everyday | <input type="text"/> sometimes a week | <input type="text"/> once a week | <input type="text"/> < once a week | <input type="text"/> several a month | <input type="text"/> < once a month | <input type="text"/> never | <div> <input type="text"/> 1/2           <input type="text"/> spoon         </div> <div> <input type="text"/> 1           <input type="text"/> glass         </div> <div> <input type="text"/> 2           <input type="text"/> bowl         </div> <div> <input type="text"/> 3           <input type="text"/> plate         </div> |
| 4 | Do you eat soy-cheese or tofu?                                  | Which season                  | <input type="text"/> Winter           | <input type="text"/> Spring      | <input type="text"/> Summer        | <input type="text"/> Autumn          | <input type="text"/> All year       | Casual portion size        |                                                                                                                                                                                                                                                                                                                                      |
|   | <input type="text"/> several a day                              | <input type="text"/> everyday | <input type="text"/> sometimes a week | <input type="text"/> once a week | <input type="text"/> < once a week | <input type="text"/> several a month | <input type="text"/> < once a month | <input type="text"/> never | <div> <input type="text"/> 1/2           <input type="text"/> spoon         </div> <div> <input type="text"/> 1           <input type="text"/> glass         </div> <div> <input type="text"/> 2           <input type="text"/> bowl         </div> <div> <input type="text"/> 3           <input type="text"/> plate         </div> |
| 5 | Do you drink "plant-milks" (coconut, haseInut, almond, rice...) | Which season                  | <input type="text"/> Winter           | <input type="text"/> Spring      | <input type="text"/> Summer        | <input type="text"/> Autumn          | <input type="text"/> All year       | Casual portion size        |                                                                                                                                                                                                                                                                                                                                      |
|   | <input type="text"/> several a day                              | <input type="text"/> everyday | <input type="text"/> sometimes a week | <input type="text"/> once a week | <input type="text"/> < once a week | <input type="text"/> several a month | <input type="text"/> < once a month | <input type="text"/> never | <div> <input type="text"/> 1/2           <input type="text"/> spoon         </div> <div> <input type="text"/> 1           <input type="text"/> glass         </div> <div> <input type="text"/> 2           <input type="text"/> bowl         </div> <div> <input type="text"/> 3           <input type="text"/> plate         </div> |

**Supplementary materials**  
**Bensaada et al.**

Supplementary data S1: Dietary Inquiry (continued)

**Consumption of elaborated dishes**

|    |                                                                                                                                                                                                                                                                                |                                                                                                                                                                                                                                                                                                                                                                                                                                                                                                                                                                                                                                                                                                                                                                                                                                                                                                                                                                                                                                                                                                                               |                             |                             |                             |                               |                            |  |     |  |       |  |   |  |       |  |   |  |      |  |   |  |       |
|----|--------------------------------------------------------------------------------------------------------------------------------------------------------------------------------------------------------------------------------------------------------------------------------|-------------------------------------------------------------------------------------------------------------------------------------------------------------------------------------------------------------------------------------------------------------------------------------------------------------------------------------------------------------------------------------------------------------------------------------------------------------------------------------------------------------------------------------------------------------------------------------------------------------------------------------------------------------------------------------------------------------------------------------------------------------------------------------------------------------------------------------------------------------------------------------------------------------------------------------------------------------------------------------------------------------------------------------------------------------------------------------------------------------------------------|-----------------------------|-----------------------------|-----------------------------|-------------------------------|----------------------------|--|-----|--|-------|--|---|--|-------|--|---|--|------|--|---|--|-------|
| 6  | <b>Do you eat soy-based products</b> <span style="color: blue;">Which season</span><br>(Saussages, burgers, minced meat, balls...)                                                                                                                                             | <input type="text"/> Winter                                                                                                                                                                                                                                                                                                                                                                                                                                                                                                                                                                                                                                                                                                                                                                                                                                                                                                                                                                                                                                                                                                   | <input type="text"/> Spring | <input type="text"/> Summer | <input type="text"/> Autumn | <input type="text"/> All year | <b>Casual portion size</b> |  |     |  |       |  |   |  |       |  |   |  |      |  |   |  |       |
|    | <input type="text"/> several a day <input type="text"/> everyday <input type="text"/> sometimes a week <input type="text"/> once a week <input type="text"/> < once a week <input type="text"/> several a month <input type="text"/> < once a month <input type="text"/> never | <table border="0" style="width: 100%;"> <tr> <td style="border: 1px solid black; width: 30px; height: 20px;"></td> <td style="width: 20px; text-align: center;">1/2</td> <td style="border: 1px solid black; width: 30px; height: 20px;"></td> <td style="width: 20px; text-align: center;">spoon</td> </tr> <tr> <td style="border: 1px solid black; width: 30px; height: 20px;"></td> <td style="width: 20px; text-align: center;">1</td> <td style="border: 1px solid black; width: 30px; height: 20px;"></td> <td style="width: 20px; text-align: center;">glass</td> </tr> <tr> <td style="border: 1px solid black; width: 30px; height: 20px;"></td> <td style="width: 20px; text-align: center;">2</td> <td style="border: 1px solid black; width: 30px; height: 20px;"></td> <td style="width: 20px; text-align: center;">bowl</td> </tr> <tr> <td style="border: 1px solid black; width: 30px; height: 20px;"></td> <td style="width: 20px; text-align: center;">3</td> <td style="border: 1px solid black; width: 30px; height: 20px;"></td> <td style="width: 20px; text-align: center;">plate</td> </tr> </table> |                             |                             |                             |                               |                            |  | 1/2 |  | spoon |  | 1 |  | glass |  | 2 |  | bowl |  | 3 |  | plate |
|    | 1/2                                                                                                                                                                                                                                                                            |                                                                                                                                                                                                                                                                                                                                                                                                                                                                                                                                                                                                                                                                                                                                                                                                                                                                                                                                                                                                                                                                                                                               | spoon                       |                             |                             |                               |                            |  |     |  |       |  |   |  |       |  |   |  |      |  |   |  |       |
|    | 1                                                                                                                                                                                                                                                                              |                                                                                                                                                                                                                                                                                                                                                                                                                                                                                                                                                                                                                                                                                                                                                                                                                                                                                                                                                                                                                                                                                                                               | glass                       |                             |                             |                               |                            |  |     |  |       |  |   |  |       |  |   |  |      |  |   |  |       |
|    | 2                                                                                                                                                                                                                                                                              |                                                                                                                                                                                                                                                                                                                                                                                                                                                                                                                                                                                                                                                                                                                                                                                                                                                                                                                                                                                                                                                                                                                               | bowl                        |                             |                             |                               |                            |  |     |  |       |  |   |  |       |  |   |  |      |  |   |  |       |
|    | 3                                                                                                                                                                                                                                                                              |                                                                                                                                                                                                                                                                                                                                                                                                                                                                                                                                                                                                                                                                                                                                                                                                                                                                                                                                                                                                                                                                                                                               | plate                       |                             |                             |                               |                            |  |     |  |       |  |   |  |       |  |   |  |      |  |   |  |       |
|    |                                                                                                                                                                                                                                                                                |                                                                                                                                                                                                                                                                                                                                                                                                                                                                                                                                                                                                                                                                                                                                                                                                                                                                                                                                                                                                                                                                                                                               |                             |                             |                             |                               |                            |  |     |  |       |  |   |  |       |  |   |  |      |  |   |  |       |
| 7  | <b>Do you eat meat-based elaborated dishes?</b> <span style="color: blue;">Which season</span><br>(paté, sauces...)                                                                                                                                                            | <input type="text"/> Winter                                                                                                                                                                                                                                                                                                                                                                                                                                                                                                                                                                                                                                                                                                                                                                                                                                                                                                                                                                                                                                                                                                   | <input type="text"/> Spring | <input type="text"/> Summer | <input type="text"/> Autumn | <input type="text"/> All year | <b>Casual portion size</b> |  |     |  |       |  |   |  |       |  |   |  |      |  |   |  |       |
|    | <input type="text"/> several a day <input type="text"/> everyday <input type="text"/> sometimes a week <input type="text"/> once a week <input type="text"/> < once a week <input type="text"/> several a month <input type="text"/> < once a month <input type="text"/> never | <table border="0" style="width: 100%;"> <tr> <td style="border: 1px solid black; width: 30px; height: 20px;"></td> <td style="width: 20px; text-align: center;">1/2</td> <td style="border: 1px solid black; width: 30px; height: 20px;"></td> <td style="width: 20px; text-align: center;">spoon</td> </tr> <tr> <td style="border: 1px solid black; width: 30px; height: 20px;"></td> <td style="width: 20px; text-align: center;">1</td> <td style="border: 1px solid black; width: 30px; height: 20px;"></td> <td style="width: 20px; text-align: center;">glass</td> </tr> <tr> <td style="border: 1px solid black; width: 30px; height: 20px;"></td> <td style="width: 20px; text-align: center;">2</td> <td style="border: 1px solid black; width: 30px; height: 20px;"></td> <td style="width: 20px; text-align: center;">bowl</td> </tr> <tr> <td style="border: 1px solid black; width: 30px; height: 20px;"></td> <td style="width: 20px; text-align: center;">3</td> <td style="border: 1px solid black; width: 30px; height: 20px;"></td> <td style="width: 20px; text-align: center;">plate</td> </tr> </table> |                             |                             |                             |                               |                            |  | 1/2 |  | spoon |  | 1 |  | glass |  | 2 |  | bowl |  | 3 |  | plate |
|    | 1/2                                                                                                                                                                                                                                                                            |                                                                                                                                                                                                                                                                                                                                                                                                                                                                                                                                                                                                                                                                                                                                                                                                                                                                                                                                                                                                                                                                                                                               | spoon                       |                             |                             |                               |                            |  |     |  |       |  |   |  |       |  |   |  |      |  |   |  |       |
|    | 1                                                                                                                                                                                                                                                                              |                                                                                                                                                                                                                                                                                                                                                                                                                                                                                                                                                                                                                                                                                                                                                                                                                                                                                                                                                                                                                                                                                                                               | glass                       |                             |                             |                               |                            |  |     |  |       |  |   |  |       |  |   |  |      |  |   |  |       |
|    | 2                                                                                                                                                                                                                                                                              |                                                                                                                                                                                                                                                                                                                                                                                                                                                                                                                                                                                                                                                                                                                                                                                                                                                                                                                                                                                                                                                                                                                               | bowl                        |                             |                             |                               |                            |  |     |  |       |  |   |  |       |  |   |  |      |  |   |  |       |
|    | 3                                                                                                                                                                                                                                                                              |                                                                                                                                                                                                                                                                                                                                                                                                                                                                                                                                                                                                                                                                                                                                                                                                                                                                                                                                                                                                                                                                                                                               | plate                       |                             |                             |                               |                            |  |     |  |       |  |   |  |       |  |   |  |      |  |   |  |       |
|    |                                                                                                                                                                                                                                                                                |                                                                                                                                                                                                                                                                                                                                                                                                                                                                                                                                                                                                                                                                                                                                                                                                                                                                                                                                                                                                                                                                                                                               |                             |                             |                             |                               |                            |  |     |  |       |  |   |  |       |  |   |  |      |  |   |  |       |
| 8  | <b>Do you eat fish-based elaborated dishes?</b> <span style="color: blue;">Which season</span><br>(surimi, paté...)                                                                                                                                                            | <input type="text"/> Winter                                                                                                                                                                                                                                                                                                                                                                                                                                                                                                                                                                                                                                                                                                                                                                                                                                                                                                                                                                                                                                                                                                   | <input type="text"/> Spring | <input type="text"/> Summer | <input type="text"/> Autumn | <input type="text"/> All year | <b>Casual portion size</b> |  |     |  |       |  |   |  |       |  |   |  |      |  |   |  |       |
|    | <input type="text"/> several a day <input type="text"/> everyday <input type="text"/> sometimes a week <input type="text"/> once a week <input type="text"/> < once a week <input type="text"/> several a month <input type="text"/> < once a month <input type="text"/> never | <table border="0" style="width: 100%;"> <tr> <td style="border: 1px solid black; width: 30px; height: 20px;"></td> <td style="width: 20px; text-align: center;">1/2</td> <td style="border: 1px solid black; width: 30px; height: 20px;"></td> <td style="width: 20px; text-align: center;">spoon</td> </tr> <tr> <td style="border: 1px solid black; width: 30px; height: 20px;"></td> <td style="width: 20px; text-align: center;">1</td> <td style="border: 1px solid black; width: 30px; height: 20px;"></td> <td style="width: 20px; text-align: center;">glass</td> </tr> <tr> <td style="border: 1px solid black; width: 30px; height: 20px;"></td> <td style="width: 20px; text-align: center;">2</td> <td style="border: 1px solid black; width: 30px; height: 20px;"></td> <td style="width: 20px; text-align: center;">bowl</td> </tr> <tr> <td style="border: 1px solid black; width: 30px; height: 20px;"></td> <td style="width: 20px; text-align: center;">3</td> <td style="border: 1px solid black; width: 30px; height: 20px;"></td> <td style="width: 20px; text-align: center;">plate</td> </tr> </table> |                             |                             |                             |                               |                            |  | 1/2 |  | spoon |  | 1 |  | glass |  | 2 |  | bowl |  | 3 |  | plate |
|    | 1/2                                                                                                                                                                                                                                                                            |                                                                                                                                                                                                                                                                                                                                                                                                                                                                                                                                                                                                                                                                                                                                                                                                                                                                                                                                                                                                                                                                                                                               | spoon                       |                             |                             |                               |                            |  |     |  |       |  |   |  |       |  |   |  |      |  |   |  |       |
|    | 1                                                                                                                                                                                                                                                                              |                                                                                                                                                                                                                                                                                                                                                                                                                                                                                                                                                                                                                                                                                                                                                                                                                                                                                                                                                                                                                                                                                                                               | glass                       |                             |                             |                               |                            |  |     |  |       |  |   |  |       |  |   |  |      |  |   |  |       |
|    | 2                                                                                                                                                                                                                                                                              |                                                                                                                                                                                                                                                                                                                                                                                                                                                                                                                                                                                                                                                                                                                                                                                                                                                                                                                                                                                                                                                                                                                               | bowl                        |                             |                             |                               |                            |  |     |  |       |  |   |  |       |  |   |  |      |  |   |  |       |
|    | 3                                                                                                                                                                                                                                                                              |                                                                                                                                                                                                                                                                                                                                                                                                                                                                                                                                                                                                                                                                                                                                                                                                                                                                                                                                                                                                                                                                                                                               | plate                       |                             |                             |                               |                            |  |     |  |       |  |   |  |       |  |   |  |      |  |   |  |       |
|    |                                                                                                                                                                                                                                                                                |                                                                                                                                                                                                                                                                                                                                                                                                                                                                                                                                                                                                                                                                                                                                                                                                                                                                                                                                                                                                                                                                                                                               |                             |                             |                             |                               |                            |  |     |  |       |  |   |  |       |  |   |  |      |  |   |  |       |
| 9  | <b>Do you eat vegetable-based elaborated dishes?</b> <span style="color: blue;">Which season</span>                                                                                                                                                                            | <input type="text"/> Winter                                                                                                                                                                                                                                                                                                                                                                                                                                                                                                                                                                                                                                                                                                                                                                                                                                                                                                                                                                                                                                                                                                   | <input type="text"/> Spring | <input type="text"/> Summer | <input type="text"/> Autumn | <input type="text"/> All year | <b>Casual portion size</b> |  |     |  |       |  |   |  |       |  |   |  |      |  |   |  |       |
|    | <input type="text"/> several a day <input type="text"/> everyday <input type="text"/> sometimes a week <input type="text"/> once a week <input type="text"/> < once a week <input type="text"/> several a month <input type="text"/> < once a month <input type="text"/> never | <table border="0" style="width: 100%;"> <tr> <td style="border: 1px solid black; width: 30px; height: 20px;"></td> <td style="width: 20px; text-align: center;">1/2</td> <td style="border: 1px solid black; width: 30px; height: 20px;"></td> <td style="width: 20px; text-align: center;">spoon</td> </tr> <tr> <td style="border: 1px solid black; width: 30px; height: 20px;"></td> <td style="width: 20px; text-align: center;">1</td> <td style="border: 1px solid black; width: 30px; height: 20px;"></td> <td style="width: 20px; text-align: center;">glass</td> </tr> <tr> <td style="border: 1px solid black; width: 30px; height: 20px;"></td> <td style="width: 20px; text-align: center;">2</td> <td style="border: 1px solid black; width: 30px; height: 20px;"></td> <td style="width: 20px; text-align: center;">bowl</td> </tr> <tr> <td style="border: 1px solid black; width: 30px; height: 20px;"></td> <td style="width: 20px; text-align: center;">3</td> <td style="border: 1px solid black; width: 30px; height: 20px;"></td> <td style="width: 20px; text-align: center;">plate</td> </tr> </table> |                             |                             |                             |                               |                            |  | 1/2 |  | spoon |  | 1 |  | glass |  | 2 |  | bowl |  | 3 |  | plate |
|    | 1/2                                                                                                                                                                                                                                                                            |                                                                                                                                                                                                                                                                                                                                                                                                                                                                                                                                                                                                                                                                                                                                                                                                                                                                                                                                                                                                                                                                                                                               | spoon                       |                             |                             |                               |                            |  |     |  |       |  |   |  |       |  |   |  |      |  |   |  |       |
|    | 1                                                                                                                                                                                                                                                                              |                                                                                                                                                                                                                                                                                                                                                                                                                                                                                                                                                                                                                                                                                                                                                                                                                                                                                                                                                                                                                                                                                                                               | glass                       |                             |                             |                               |                            |  |     |  |       |  |   |  |       |  |   |  |      |  |   |  |       |
|    | 2                                                                                                                                                                                                                                                                              |                                                                                                                                                                                                                                                                                                                                                                                                                                                                                                                                                                                                                                                                                                                                                                                                                                                                                                                                                                                                                                                                                                                               | bowl                        |                             |                             |                               |                            |  |     |  |       |  |   |  |       |  |   |  |      |  |   |  |       |
|    | 3                                                                                                                                                                                                                                                                              |                                                                                                                                                                                                                                                                                                                                                                                                                                                                                                                                                                                                                                                                                                                                                                                                                                                                                                                                                                                                                                                                                                                               | plate                       |                             |                             |                               |                            |  |     |  |       |  |   |  |       |  |   |  |      |  |   |  |       |
|    |                                                                                                                                                                                                                                                                                |                                                                                                                                                                                                                                                                                                                                                                                                                                                                                                                                                                                                                                                                                                                                                                                                                                                                                                                                                                                                                                                                                                                               |                             |                             |                             |                               |                            |  |     |  |       |  |   |  |       |  |   |  |      |  |   |  |       |
| 10 | <b>Do you eat pizzas?</b> <span style="color: blue;">Which season</span>                                                                                                                                                                                                       | <input type="text"/> Winter                                                                                                                                                                                                                                                                                                                                                                                                                                                                                                                                                                                                                                                                                                                                                                                                                                                                                                                                                                                                                                                                                                   | <input type="text"/> Spring | <input type="text"/> Summer | <input type="text"/> Autumn | <input type="text"/> All year | <b>Casual portion size</b> |  |     |  |       |  |   |  |       |  |   |  |      |  |   |  |       |
|    | <input type="text"/> several a day <input type="text"/> everyday <input type="text"/> sometimes a week <input type="text"/> once a week <input type="text"/> < once a week <input type="text"/> several a month <input type="text"/> < once a month <input type="text"/> never | <table border="0" style="width: 100%;"> <tr> <td style="border: 1px solid black; width: 30px; height: 20px;"></td> <td style="width: 20px; text-align: center;">1/2</td> <td style="border: 1px solid black; width: 30px; height: 20px;"></td> <td style="width: 20px; text-align: center;">spoon</td> </tr> <tr> <td style="border: 1px solid black; width: 30px; height: 20px;"></td> <td style="width: 20px; text-align: center;">1</td> <td style="border: 1px solid black; width: 30px; height: 20px;"></td> <td style="width: 20px; text-align: center;">glass</td> </tr> <tr> <td style="border: 1px solid black; width: 30px; height: 20px;"></td> <td style="width: 20px; text-align: center;">2</td> <td style="border: 1px solid black; width: 30px; height: 20px;"></td> <td style="width: 20px; text-align: center;">bowl</td> </tr> <tr> <td style="border: 1px solid black; width: 30px; height: 20px;"></td> <td style="width: 20px; text-align: center;">3</td> <td style="border: 1px solid black; width: 30px; height: 20px;"></td> <td style="width: 20px; text-align: center;">plate</td> </tr> </table> |                             |                             |                             |                               |                            |  | 1/2 |  | spoon |  | 1 |  | glass |  | 2 |  | bowl |  | 3 |  | plate |
|    | 1/2                                                                                                                                                                                                                                                                            |                                                                                                                                                                                                                                                                                                                                                                                                                                                                                                                                                                                                                                                                                                                                                                                                                                                                                                                                                                                                                                                                                                                               | spoon                       |                             |                             |                               |                            |  |     |  |       |  |   |  |       |  |   |  |      |  |   |  |       |
|    | 1                                                                                                                                                                                                                                                                              |                                                                                                                                                                                                                                                                                                                                                                                                                                                                                                                                                                                                                                                                                                                                                                                                                                                                                                                                                                                                                                                                                                                               | glass                       |                             |                             |                               |                            |  |     |  |       |  |   |  |       |  |   |  |      |  |   |  |       |
|    | 2                                                                                                                                                                                                                                                                              |                                                                                                                                                                                                                                                                                                                                                                                                                                                                                                                                                                                                                                                                                                                                                                                                                                                                                                                                                                                                                                                                                                                               | bowl                        |                             |                             |                               |                            |  |     |  |       |  |   |  |       |  |   |  |      |  |   |  |       |
|    | 3                                                                                                                                                                                                                                                                              |                                                                                                                                                                                                                                                                                                                                                                                                                                                                                                                                                                                                                                                                                                                                                                                                                                                                                                                                                                                                                                                                                                                               | plate                       |                             |                             |                               |                            |  |     |  |       |  |   |  |       |  |   |  |      |  |   |  |       |

# Supplementary materials

## Bensaada et al.

### Supplementary data S1: Dietary Inquiry (continued)

|    |                                      |                               |                                       |                                  |                                    |                                      |                                     |                            |                                                                                                                                                                                                                                                                                                                                      |
|----|--------------------------------------|-------------------------------|---------------------------------------|----------------------------------|------------------------------------|--------------------------------------|-------------------------------------|----------------------------|--------------------------------------------------------------------------------------------------------------------------------------------------------------------------------------------------------------------------------------------------------------------------------------------------------------------------------------|
| 11 | Do you eat fresh elaborated dishes?  | Which season                  | <input type="text"/> Winter           | <input type="text"/> Spring      | <input type="text"/> Summer        | <input type="text"/> Autumn          | <input type="text"/> All year       | Casual portion size        |                                                                                                                                                                                                                                                                                                                                      |
|    | <input type="text"/> several a day   | <input type="text"/> everyday | <input type="text"/> sometimes a week | <input type="text"/> once a week | <input type="text"/> < once a week | <input type="text"/> several a month | <input type="text"/> < once a month | <input type="text"/> never | <div> <input type="text"/> 1/2           <input type="text"/> spoon         </div> <div> <input type="text"/> 1           <input type="text"/> glass         </div> <div> <input type="text"/> 2           <input type="text"/> bowl         </div> <div> <input type="text"/> 3           <input type="text"/> plate         </div> |
| 12 | Do you eat meat-based canned dishes? | Which season                  | <input type="text"/> Winter           | <input type="text"/> Spring      | <input type="text"/> Summer        | <input type="text"/> Autumn          | <input type="text"/> All year       | Casual portion size        |                                                                                                                                                                                                                                                                                                                                      |
|    | <input type="text"/> several a day   | <input type="text"/> everyday | <input type="text"/> sometimes a week | <input type="text"/> once a week | <input type="text"/> < once a week | <input type="text"/> several a month | <input type="text"/> < once a month | <input type="text"/> never | <div> <input type="text"/> 1/2           <input type="text"/> spoon         </div> <div> <input type="text"/> 1           <input type="text"/> glass         </div> <div> <input type="text"/> 2           <input type="text"/> bowl         </div> <div> <input type="text"/> 3           <input type="text"/> plate         </div> |
| 13 | Do you eat nuggets frozen or not?    | Which season                  | <input type="text"/> Winter           | <input type="text"/> Spring      | <input type="text"/> Summer        | <input type="text"/> Autumn          | <input type="text"/> All year       | Casual portion size        |                                                                                                                                                                                                                                                                                                                                      |
|    | <input type="text"/> several a day   | <input type="text"/> everyday | <input type="text"/> sometimes a week | <input type="text"/> once a week | <input type="text"/> < once a week | <input type="text"/> several a month | <input type="text"/> < once a month | <input type="text"/> never | <div> <input type="text"/> 1/2           <input type="text"/> spoon         </div> <div> <input type="text"/> 1           <input type="text"/> glass         </div> <div> <input type="text"/> 2           <input type="text"/> bowl         </div> <div> <input type="text"/> 3           <input type="text"/> plate         </div> |
| 14 | Do you eat Kebbabs or hamburgers?    | Which season                  | <input type="text"/> Winter           | <input type="text"/> Spring      | <input type="text"/> Summer        | <input type="text"/> Autumn          | <input type="text"/> All year       | Casual portion size        |                                                                                                                                                                                                                                                                                                                                      |
|    | <input type="text"/> several a day   | <input type="text"/> everyday | <input type="text"/> sometimes a week | <input type="text"/> once a week | <input type="text"/> < once a week | <input type="text"/> several a month | <input type="text"/> < once a month | <input type="text"/> never | <div> <input type="text"/> 1/2           <input type="text"/> spoon         </div> <div> <input type="text"/> 1           <input type="text"/> glass         </div> <div> <input type="text"/> 2           <input type="text"/> bowl         </div> <div> <input type="text"/> 3           <input type="text"/> plate         </div> |
| 15 | Do you eat meat-balls frozen or not? | Which season                  | <input type="text"/> Winter           | <input type="text"/> Spring      | <input type="text"/> Summer        | <input type="text"/> Autumn          | <input type="text"/> All year       | Casual portion size        |                                                                                                                                                                                                                                                                                                                                      |
|    | <input type="text"/> several a day   | <input type="text"/> everyday | <input type="text"/> sometimes a week | <input type="text"/> once a week | <input type="text"/> < once a week | <input type="text"/> several a month | <input type="text"/> < once a month | <input type="text"/> never | <div> <input type="text"/> 1/2           <input type="text"/> spoon         </div> <div> <input type="text"/> 1           <input type="text"/> glass         </div> <div> <input type="text"/> 2           <input type="text"/> bowl         </div> <div> <input type="text"/> 3           <input type="text"/> plate         </div> |

Supplementary materials  
Bensaada et al.

Supplementary data S1: Dietary Inquiry (continued)

|                      |                                                   |                               |                                       |                                  |                                    |                                      |                                     |                            |                                                                                                                                                                                                                                                                                                                                                                                              |                      |     |                      |       |                      |   |                      |       |                      |   |                      |      |                      |   |                      |       |
|----------------------|---------------------------------------------------|-------------------------------|---------------------------------------|----------------------------------|------------------------------------|--------------------------------------|-------------------------------------|----------------------------|----------------------------------------------------------------------------------------------------------------------------------------------------------------------------------------------------------------------------------------------------------------------------------------------------------------------------------------------------------------------------------------------|----------------------|-----|----------------------|-------|----------------------|---|----------------------|-------|----------------------|---|----------------------|------|----------------------|---|----------------------|-------|
| 16                   | Do you eat "escaloppe cordon bleu" frozen or not? | Which season                  | <input type="text"/> Winter           | <input type="text"/> Spring      | <input type="text"/> Summer        | <input type="text"/> Autumn          | <input type="text"/> All year       | Casual portion size        |                                                                                                                                                                                                                                                                                                                                                                                              |                      |     |                      |       |                      |   |                      |       |                      |   |                      |      |                      |   |                      |       |
|                      | <input type="text"/> several a day                | <input type="text"/> everyday | <input type="text"/> sometimes a week | <input type="text"/> once a week | <input type="text"/> < once a week | <input type="text"/> several a month | <input type="text"/> < once a month | <input type="text"/> never | <table><tr><td><input type="text"/></td><td>1/2</td><td><input type="text"/></td><td>spoon</td></tr><tr><td><input type="text"/></td><td>1</td><td><input type="text"/></td><td>glass</td></tr><tr><td><input type="text"/></td><td>2</td><td><input type="text"/></td><td>bowl</td></tr><tr><td><input type="text"/></td><td>3</td><td><input type="text"/></td><td>plate</td></tr></table> | <input type="text"/> | 1/2 | <input type="text"/> | spoon | <input type="text"/> | 1 | <input type="text"/> | glass | <input type="text"/> | 2 | <input type="text"/> | bowl | <input type="text"/> | 3 | <input type="text"/> | plate |
| <input type="text"/> | 1/2                                               | <input type="text"/>          | spoon                                 |                                  |                                    |                                      |                                     |                            |                                                                                                                                                                                                                                                                                                                                                                                              |                      |     |                      |       |                      |   |                      |       |                      |   |                      |      |                      |   |                      |       |
| <input type="text"/> | 1                                                 | <input type="text"/>          | glass                                 |                                  |                                    |                                      |                                     |                            |                                                                                                                                                                                                                                                                                                                                                                                              |                      |     |                      |       |                      |   |                      |       |                      |   |                      |      |                      |   |                      |       |
| <input type="text"/> | 2                                                 | <input type="text"/>          | bowl                                  |                                  |                                    |                                      |                                     |                            |                                                                                                                                                                                                                                                                                                                                                                                              |                      |     |                      |       |                      |   |                      |       |                      |   |                      |      |                      |   |                      |       |
| <input type="text"/> | 3                                                 | <input type="text"/>          | plate                                 |                                  |                                    |                                      |                                     |                            |                                                                                                                                                                                                                                                                                                                                                                                              |                      |     |                      |       |                      |   |                      |       |                      |   |                      |      |                      |   |                      |       |
| 17                   | Do you eat stuffed vegetables frozen or not?      | Which season                  | <input type="text"/> Winter           | <input type="text"/> Spring      | <input type="text"/> Summer        | <input type="text"/> Autumn          | <input type="text"/> All year       | Casual portion size        |                                                                                                                                                                                                                                                                                                                                                                                              |                      |     |                      |       |                      |   |                      |       |                      |   |                      |      |                      |   |                      |       |
|                      | <input type="text"/> several a day                | <input type="text"/> everyday | <input type="text"/> sometimes a week | <input type="text"/> once a week | <input type="text"/> < once a week | <input type="text"/> several a month | <input type="text"/> < once a month | <input type="text"/> never | <table><tr><td><input type="text"/></td><td>1/2</td><td><input type="text"/></td><td>spoon</td></tr><tr><td><input type="text"/></td><td>1</td><td><input type="text"/></td><td>glass</td></tr><tr><td><input type="text"/></td><td>2</td><td><input type="text"/></td><td>bowl</td></tr><tr><td><input type="text"/></td><td>3</td><td><input type="text"/></td><td>plate</td></tr></table> | <input type="text"/> | 1/2 | <input type="text"/> | spoon | <input type="text"/> | 1 | <input type="text"/> | glass | <input type="text"/> | 2 | <input type="text"/> | bowl | <input type="text"/> | 3 | <input type="text"/> | plate |
| <input type="text"/> | 1/2                                               | <input type="text"/>          | spoon                                 |                                  |                                    |                                      |                                     |                            |                                                                                                                                                                                                                                                                                                                                                                                              |                      |     |                      |       |                      |   |                      |       |                      |   |                      |      |                      |   |                      |       |
| <input type="text"/> | 1                                                 | <input type="text"/>          | glass                                 |                                  |                                    |                                      |                                     |                            |                                                                                                                                                                                                                                                                                                                                                                                              |                      |     |                      |       |                      |   |                      |       |                      |   |                      |      |                      |   |                      |       |
| <input type="text"/> | 2                                                 | <input type="text"/>          | bowl                                  |                                  |                                    |                                      |                                     |                            |                                                                                                                                                                                                                                                                                                                                                                                              |                      |     |                      |       |                      |   |                      |       |                      |   |                      |      |                      |   |                      |       |
| <input type="text"/> | 3                                                 | <input type="text"/>          | plate                                 |                                  |                                    |                                      |                                     |                            |                                                                                                                                                                                                                                                                                                                                                                                              |                      |     |                      |       |                      |   |                      |       |                      |   |                      |      |                      |   |                      |       |
| 18                   | Do you eat frozen ground beef?                    | Which season                  | <input type="text"/> Winter           | <input type="text"/> Spring      | <input type="text"/> Summer        | <input type="text"/> Autumn          | <input type="text"/> All year       | Casual portion size        |                                                                                                                                                                                                                                                                                                                                                                                              |                      |     |                      |       |                      |   |                      |       |                      |   |                      |      |                      |   |                      |       |
|                      | <input type="text"/> several a day                | <input type="text"/> everyday | <input type="text"/> sometimes a week | <input type="text"/> once a week | <input type="text"/> < once a week | <input type="text"/> several a month | <input type="text"/> < once a month | <input type="text"/> never | <table><tr><td><input type="text"/></td><td>1/2</td><td><input type="text"/></td><td>spoon</td></tr><tr><td><input type="text"/></td><td>1</td><td><input type="text"/></td><td>glass</td></tr><tr><td><input type="text"/></td><td>2</td><td><input type="text"/></td><td>bowl</td></tr><tr><td><input type="text"/></td><td>3</td><td><input type="text"/></td><td>plate</td></tr></table> | <input type="text"/> | 1/2 | <input type="text"/> | spoon | <input type="text"/> | 1 | <input type="text"/> | glass | <input type="text"/> | 2 | <input type="text"/> | bowl | <input type="text"/> | 3 | <input type="text"/> | plate |
| <input type="text"/> | 1/2                                               | <input type="text"/>          | spoon                                 |                                  |                                    |                                      |                                     |                            |                                                                                                                                                                                                                                                                                                                                                                                              |                      |     |                      |       |                      |   |                      |       |                      |   |                      |      |                      |   |                      |       |
| <input type="text"/> | 1                                                 | <input type="text"/>          | glass                                 |                                  |                                    |                                      |                                     |                            |                                                                                                                                                                                                                                                                                                                                                                                              |                      |     |                      |       |                      |   |                      |       |                      |   |                      |      |                      |   |                      |       |
| <input type="text"/> | 2                                                 | <input type="text"/>          | bowl                                  |                                  |                                    |                                      |                                     |                            |                                                                                                                                                                                                                                                                                                                                                                                              |                      |     |                      |       |                      |   |                      |       |                      |   |                      |      |                      |   |                      |       |
| <input type="text"/> | 3                                                 | <input type="text"/>          | plate                                 |                                  |                                    |                                      |                                     |                            |                                                                                                                                                                                                                                                                                                                                                                                              |                      |     |                      |       |                      |   |                      |       |                      |   |                      |      |                      |   |                      |       |
| 19                   | Do you eat industrial biscuits?                   | Which season                  | <input type="text"/> Winter           | <input type="text"/> Spring      | <input type="text"/> Summer        | <input type="text"/> Autumn          | <input type="text"/> All year       | Casual portion size        |                                                                                                                                                                                                                                                                                                                                                                                              |                      |     |                      |       |                      |   |                      |       |                      |   |                      |      |                      |   |                      |       |
|                      | <input type="text"/> several a day                | <input type="text"/> everyday | <input type="text"/> sometimes a week | <input type="text"/> once a week | <input type="text"/> < once a week | <input type="text"/> several a month | <input type="text"/> < once a month | <input type="text"/> never | <table><tr><td><input type="text"/></td><td>1/2</td><td><input type="text"/></td><td>spoon</td></tr><tr><td><input type="text"/></td><td>1</td><td><input type="text"/></td><td>glass</td></tr><tr><td><input type="text"/></td><td>2</td><td><input type="text"/></td><td>bowl</td></tr><tr><td><input type="text"/></td><td>3</td><td><input type="text"/></td><td>plate</td></tr></table> | <input type="text"/> | 1/2 | <input type="text"/> | spoon | <input type="text"/> | 1 | <input type="text"/> | glass | <input type="text"/> | 2 | <input type="text"/> | bowl | <input type="text"/> | 3 | <input type="text"/> | plate |
| <input type="text"/> | 1/2                                               | <input type="text"/>          | spoon                                 |                                  |                                    |                                      |                                     |                            |                                                                                                                                                                                                                                                                                                                                                                                              |                      |     |                      |       |                      |   |                      |       |                      |   |                      |      |                      |   |                      |       |
| <input type="text"/> | 1                                                 | <input type="text"/>          | glass                                 |                                  |                                    |                                      |                                     |                            |                                                                                                                                                                                                                                                                                                                                                                                              |                      |     |                      |       |                      |   |                      |       |                      |   |                      |      |                      |   |                      |       |
| <input type="text"/> | 2                                                 | <input type="text"/>          | bowl                                  |                                  |                                    |                                      |                                     |                            |                                                                                                                                                                                                                                                                                                                                                                                              |                      |     |                      |       |                      |   |                      |       |                      |   |                      |      |                      |   |                      |       |
| <input type="text"/> | 3                                                 | <input type="text"/>          | plate                                 |                                  |                                    |                                      |                                     |                            |                                                                                                                                                                                                                                                                                                                                                                                              |                      |     |                      |       |                      |   |                      |       |                      |   |                      |      |                      |   |                      |       |

---

**Supplementary materials**  
**Bensaada et al.**

Supplementary data S1: Dietary Inquiry (continued)

**Legume consumption raw or cooked**

|           |                                                                                                                                                                                                                                                                                |                     |                             |                             |                             |                             |                               |                                                                                                                                                                                                                                                                                                                                                                                                                                                                                                                                                                                                                                                                                                                                                                                                                                                                                                                                                                                                  |  |     |  |       |  |   |  |       |  |   |  |      |  |   |  |       |
|-----------|--------------------------------------------------------------------------------------------------------------------------------------------------------------------------------------------------------------------------------------------------------------------------------|---------------------|-----------------------------|-----------------------------|-----------------------------|-----------------------------|-------------------------------|--------------------------------------------------------------------------------------------------------------------------------------------------------------------------------------------------------------------------------------------------------------------------------------------------------------------------------------------------------------------------------------------------------------------------------------------------------------------------------------------------------------------------------------------------------------------------------------------------------------------------------------------------------------------------------------------------------------------------------------------------------------------------------------------------------------------------------------------------------------------------------------------------------------------------------------------------------------------------------------------------|--|-----|--|-------|--|---|--|-------|--|---|--|------|--|---|--|-------|
| <b>20</b> | <b>Do you eat legumes like beans, lentils, peas</b>                                                                                                                                                                                                                            | <b>Which season</b> | <input type="text"/> Winter | <input type="text"/> Spring | <input type="text"/> Summer | <input type="text"/> Autumn | <input type="text"/> All year | <b>Casual portion size</b>                                                                                                                                                                                                                                                                                                                                                                                                                                                                                                                                                                                                                                                                                                                                                                                                                                                                                                                                                                       |  |     |  |       |  |   |  |       |  |   |  |      |  |   |  |       |
|           | <input type="text"/> several a day <input type="text"/> everyday <input type="text"/> sometimes a week <input type="text"/> once a week <input type="text"/> < once a week <input type="text"/> several a month <input type="text"/> < once a month <input type="text"/> never |                     |                             |                             |                             |                             |                               | <table border="0" style="display: inline-table; vertical-align: top;"> <tr><td style="border: 1px solid black; width: 30px; height: 20px;"></td><td style="padding: 0 5px;">1/2</td><td style="border: 1px solid black; width: 30px; height: 20px;"></td><td style="padding: 0 5px;">spoon</td></tr> <tr><td style="border: 1px solid black; width: 30px; height: 20px;"></td><td style="padding: 0 5px;">1</td><td style="border: 1px solid black; width: 30px; height: 20px;"></td><td style="padding: 0 5px;">glass</td></tr> <tr><td style="border: 1px solid black; width: 30px; height: 20px;"></td><td style="padding: 0 5px;">2</td><td style="border: 1px solid black; width: 30px; height: 20px;"></td><td style="padding: 0 5px;">bowl</td></tr> <tr><td style="border: 1px solid black; width: 30px; height: 20px;"></td><td style="padding: 0 5px;">3</td><td style="border: 1px solid black; width: 30px; height: 20px;"></td><td style="padding: 0 5px;">plate</td></tr> </table> |  | 1/2 |  | spoon |  | 1 |  | glass |  | 2 |  | bowl |  | 3 |  | plate |
|           | 1/2                                                                                                                                                                                                                                                                            |                     | spoon                       |                             |                             |                             |                               |                                                                                                                                                                                                                                                                                                                                                                                                                                                                                                                                                                                                                                                                                                                                                                                                                                                                                                                                                                                                  |  |     |  |       |  |   |  |       |  |   |  |      |  |   |  |       |
|           | 1                                                                                                                                                                                                                                                                              |                     | glass                       |                             |                             |                             |                               |                                                                                                                                                                                                                                                                                                                                                                                                                                                                                                                                                                                                                                                                                                                                                                                                                                                                                                                                                                                                  |  |     |  |       |  |   |  |       |  |   |  |      |  |   |  |       |
|           | 2                                                                                                                                                                                                                                                                              |                     | bowl                        |                             |                             |                             |                               |                                                                                                                                                                                                                                                                                                                                                                                                                                                                                                                                                                                                                                                                                                                                                                                                                                                                                                                                                                                                  |  |     |  |       |  |   |  |       |  |   |  |      |  |   |  |       |
|           | 3                                                                                                                                                                                                                                                                              |                     | plate                       |                             |                             |                             |                               |                                                                                                                                                                                                                                                                                                                                                                                                                                                                                                                                                                                                                                                                                                                                                                                                                                                                                                                                                                                                  |  |     |  |       |  |   |  |       |  |   |  |      |  |   |  |       |
| <br>      |                                                                                                                                                                                                                                                                                |                     |                             |                             |                             |                             |                               |                                                                                                                                                                                                                                                                                                                                                                                                                                                                                                                                                                                                                                                                                                                                                                                                                                                                                                                                                                                                  |  |     |  |       |  |   |  |       |  |   |  |      |  |   |  |       |
| <b>21</b> | <b>Do you eat chick-peas?</b>                                                                                                                                                                                                                                                  | <b>Which season</b> | <input type="text"/> Winter | <input type="text"/> Spring | <input type="text"/> Summer | <input type="text"/> Autumn | <input type="text"/> All year | <b>Casual portion size</b>                                                                                                                                                                                                                                                                                                                                                                                                                                                                                                                                                                                                                                                                                                                                                                                                                                                                                                                                                                       |  |     |  |       |  |   |  |       |  |   |  |      |  |   |  |       |
|           | <input type="text"/> several a day <input type="text"/> everyday <input type="text"/> sometimes a week <input type="text"/> once a week <input type="text"/> < once a week <input type="text"/> several a month <input type="text"/> < once a month <input type="text"/> never |                     |                             |                             |                             |                             |                               | <table border="0" style="display: inline-table; vertical-align: top;"> <tr><td style="border: 1px solid black; width: 30px; height: 20px;"></td><td style="padding: 0 5px;">1/2</td><td style="border: 1px solid black; width: 30px; height: 20px;"></td><td style="padding: 0 5px;">spoon</td></tr> <tr><td style="border: 1px solid black; width: 30px; height: 20px;"></td><td style="padding: 0 5px;">1</td><td style="border: 1px solid black; width: 30px; height: 20px;"></td><td style="padding: 0 5px;">glass</td></tr> <tr><td style="border: 1px solid black; width: 30px; height: 20px;"></td><td style="padding: 0 5px;">2</td><td style="border: 1px solid black; width: 30px; height: 20px;"></td><td style="padding: 0 5px;">bowl</td></tr> <tr><td style="border: 1px solid black; width: 30px; height: 20px;"></td><td style="padding: 0 5px;">3</td><td style="border: 1px solid black; width: 30px; height: 20px;"></td><td style="padding: 0 5px;">plate</td></tr> </table> |  | 1/2 |  | spoon |  | 1 |  | glass |  | 2 |  | bowl |  | 3 |  | plate |
|           | 1/2                                                                                                                                                                                                                                                                            |                     | spoon                       |                             |                             |                             |                               |                                                                                                                                                                                                                                                                                                                                                                                                                                                                                                                                                                                                                                                                                                                                                                                                                                                                                                                                                                                                  |  |     |  |       |  |   |  |       |  |   |  |      |  |   |  |       |
|           | 1                                                                                                                                                                                                                                                                              |                     | glass                       |                             |                             |                             |                               |                                                                                                                                                                                                                                                                                                                                                                                                                                                                                                                                                                                                                                                                                                                                                                                                                                                                                                                                                                                                  |  |     |  |       |  |   |  |       |  |   |  |      |  |   |  |       |
|           | 2                                                                                                                                                                                                                                                                              |                     | bowl                        |                             |                             |                             |                               |                                                                                                                                                                                                                                                                                                                                                                                                                                                                                                                                                                                                                                                                                                                                                                                                                                                                                                                                                                                                  |  |     |  |       |  |   |  |       |  |   |  |      |  |   |  |       |
|           | 3                                                                                                                                                                                                                                                                              |                     | plate                       |                             |                             |                             |                               |                                                                                                                                                                                                                                                                                                                                                                                                                                                                                                                                                                                                                                                                                                                                                                                                                                                                                                                                                                                                  |  |     |  |       |  |   |  |       |  |   |  |      |  |   |  |       |
| <br>      |                                                                                                                                                                                                                                                                                |                     |                             |                             |                             |                             |                               |                                                                                                                                                                                                                                                                                                                                                                                                                                                                                                                                                                                                                                                                                                                                                                                                                                                                                                                                                                                                  |  |     |  |       |  |   |  |       |  |   |  |      |  |   |  |       |
| <b>22</b> | <b>Do you eat soybeans ?</b>                                                                                                                                                                                                                                                   | <b>Which season</b> | <input type="text"/> Winter | <input type="text"/> Spring | <input type="text"/> Summer | <input type="text"/> Autumn | <input type="text"/> All year | <b>Casual portion size</b>                                                                                                                                                                                                                                                                                                                                                                                                                                                                                                                                                                                                                                                                                                                                                                                                                                                                                                                                                                       |  |     |  |       |  |   |  |       |  |   |  |      |  |   |  |       |
|           | <input type="text"/> several a day <input type="text"/> everyday <input type="text"/> sometimes a week <input type="text"/> once a week <input type="text"/> < once a week <input type="text"/> several a month <input type="text"/> < once a month <input type="text"/> never |                     |                             |                             |                             |                             |                               | <table border="0" style="display: inline-table; vertical-align: top;"> <tr><td style="border: 1px solid black; width: 30px; height: 20px;"></td><td style="padding: 0 5px;">1/2</td><td style="border: 1px solid black; width: 30px; height: 20px;"></td><td style="padding: 0 5px;">spoon</td></tr> <tr><td style="border: 1px solid black; width: 30px; height: 20px;"></td><td style="padding: 0 5px;">1</td><td style="border: 1px solid black; width: 30px; height: 20px;"></td><td style="padding: 0 5px;">glass</td></tr> <tr><td style="border: 1px solid black; width: 30px; height: 20px;"></td><td style="padding: 0 5px;">2</td><td style="border: 1px solid black; width: 30px; height: 20px;"></td><td style="padding: 0 5px;">bowl</td></tr> <tr><td style="border: 1px solid black; width: 30px; height: 20px;"></td><td style="padding: 0 5px;">3</td><td style="border: 1px solid black; width: 30px; height: 20px;"></td><td style="padding: 0 5px;">plate</td></tr> </table> |  | 1/2 |  | spoon |  | 1 |  | glass |  | 2 |  | bowl |  | 3 |  | plate |
|           | 1/2                                                                                                                                                                                                                                                                            |                     | spoon                       |                             |                             |                             |                               |                                                                                                                                                                                                                                                                                                                                                                                                                                                                                                                                                                                                                                                                                                                                                                                                                                                                                                                                                                                                  |  |     |  |       |  |   |  |       |  |   |  |      |  |   |  |       |
|           | 1                                                                                                                                                                                                                                                                              |                     | glass                       |                             |                             |                             |                               |                                                                                                                                                                                                                                                                                                                                                                                                                                                                                                                                                                                                                                                                                                                                                                                                                                                                                                                                                                                                  |  |     |  |       |  |   |  |       |  |   |  |      |  |   |  |       |
|           | 2                                                                                                                                                                                                                                                                              |                     | bowl                        |                             |                             |                             |                               |                                                                                                                                                                                                                                                                                                                                                                                                                                                                                                                                                                                                                                                                                                                                                                                                                                                                                                                                                                                                  |  |     |  |       |  |   |  |       |  |   |  |      |  |   |  |       |
|           | 3                                                                                                                                                                                                                                                                              |                     | plate                       |                             |                             |                             |                               |                                                                                                                                                                                                                                                                                                                                                                                                                                                                                                                                                                                                                                                                                                                                                                                                                                                                                                                                                                                                  |  |     |  |       |  |   |  |       |  |   |  |      |  |   |  |       |
| <br>      |                                                                                                                                                                                                                                                                                |                     |                             |                             |                             |                             |                               |                                                                                                                                                                                                                                                                                                                                                                                                                                                                                                                                                                                                                                                                                                                                                                                                                                                                                                                                                                                                  |  |     |  |       |  |   |  |       |  |   |  |      |  |   |  |       |
| <b>23</b> | <b>Do you eat mungo-sprouts?</b>                                                                                                                                                                                                                                               | <b>Which season</b> | <input type="text"/> Winter | <input type="text"/> Spring | <input type="text"/> Summer | <input type="text"/> Autumn | <input type="text"/> All year | <b>Casual portion size</b>                                                                                                                                                                                                                                                                                                                                                                                                                                                                                                                                                                                                                                                                                                                                                                                                                                                                                                                                                                       |  |     |  |       |  |   |  |       |  |   |  |      |  |   |  |       |
|           | <input type="text"/> several a day <input type="text"/> everyday <input type="text"/> sometimes a week <input type="text"/> once a week <input type="text"/> < once a week <input type="text"/> several a month <input type="text"/> < once a month <input type="text"/> never |                     |                             |                             |                             |                             |                               | <table border="0" style="display: inline-table; vertical-align: top;"> <tr><td style="border: 1px solid black; width: 30px; height: 20px;"></td><td style="padding: 0 5px;">1/2</td><td style="border: 1px solid black; width: 30px; height: 20px;"></td><td style="padding: 0 5px;">spoon</td></tr> <tr><td style="border: 1px solid black; width: 30px; height: 20px;"></td><td style="padding: 0 5px;">1</td><td style="border: 1px solid black; width: 30px; height: 20px;"></td><td style="padding: 0 5px;">glass</td></tr> <tr><td style="border: 1px solid black; width: 30px; height: 20px;"></td><td style="padding: 0 5px;">2</td><td style="border: 1px solid black; width: 30px; height: 20px;"></td><td style="padding: 0 5px;">bowl</td></tr> <tr><td style="border: 1px solid black; width: 30px; height: 20px;"></td><td style="padding: 0 5px;">3</td><td style="border: 1px solid black; width: 30px; height: 20px;"></td><td style="padding: 0 5px;">plate</td></tr> </table> |  | 1/2 |  | spoon |  | 1 |  | glass |  | 2 |  | bowl |  | 3 |  | plate |
|           | 1/2                                                                                                                                                                                                                                                                            |                     | spoon                       |                             |                             |                             |                               |                                                                                                                                                                                                                                                                                                                                                                                                                                                                                                                                                                                                                                                                                                                                                                                                                                                                                                                                                                                                  |  |     |  |       |  |   |  |       |  |   |  |      |  |   |  |       |
|           | 1                                                                                                                                                                                                                                                                              |                     | glass                       |                             |                             |                             |                               |                                                                                                                                                                                                                                                                                                                                                                                                                                                                                                                                                                                                                                                                                                                                                                                                                                                                                                                                                                                                  |  |     |  |       |  |   |  |       |  |   |  |      |  |   |  |       |
|           | 2                                                                                                                                                                                                                                                                              |                     | bowl                        |                             |                             |                             |                               |                                                                                                                                                                                                                                                                                                                                                                                                                                                                                                                                                                                                                                                                                                                                                                                                                                                                                                                                                                                                  |  |     |  |       |  |   |  |       |  |   |  |      |  |   |  |       |
|           | 3                                                                                                                                                                                                                                                                              |                     | plate                       |                             |                             |                             |                               |                                                                                                                                                                                                                                                                                                                                                                                                                                                                                                                                                                                                                                                                                                                                                                                                                                                                                                                                                                                                  |  |     |  |       |  |   |  |       |  |   |  |      |  |   |  |       |
| <br>      |                                                                                                                                                                                                                                                                                |                     |                             |                             |                             |                             |                               |                                                                                                                                                                                                                                                                                                                                                                                                                                                                                                                                                                                                                                                                                                                                                                                                                                                                                                                                                                                                  |  |     |  |       |  |   |  |       |  |   |  |      |  |   |  |       |
| <b>24</b> | <b>Do you eat alfalfa or clover sprouts?</b>                                                                                                                                                                                                                                   | <b>Which season</b> | <input type="text"/> Winter | <input type="text"/> Spring | <input type="text"/> Summer | <input type="text"/> Autumn | <input type="text"/> All year | <b>Casual portion size</b>                                                                                                                                                                                                                                                                                                                                                                                                                                                                                                                                                                                                                                                                                                                                                                                                                                                                                                                                                                       |  |     |  |       |  |   |  |       |  |   |  |      |  |   |  |       |
|           | <input type="text"/> several a day <input type="text"/> everyday <input type="text"/> sometimes a week <input type="text"/> once a week <input type="text"/> < once a week <input type="text"/> several a month <input type="text"/> < once a month <input type="text"/> never |                     |                             |                             |                             |                             |                               | <table border="0" style="display: inline-table; vertical-align: top;"> <tr><td style="border: 1px solid black; width: 30px; height: 20px;"></td><td style="padding: 0 5px;">1/2</td><td style="border: 1px solid black; width: 30px; height: 20px;"></td><td style="padding: 0 5px;">spoon</td></tr> <tr><td style="border: 1px solid black; width: 30px; height: 20px;"></td><td style="padding: 0 5px;">1</td><td style="border: 1px solid black; width: 30px; height: 20px;"></td><td style="padding: 0 5px;">glass</td></tr> <tr><td style="border: 1px solid black; width: 30px; height: 20px;"></td><td style="padding: 0 5px;">2</td><td style="border: 1px solid black; width: 30px; height: 20px;"></td><td style="padding: 0 5px;">bowl</td></tr> <tr><td style="border: 1px solid black; width: 30px; height: 20px;"></td><td style="padding: 0 5px;">3</td><td style="border: 1px solid black; width: 30px; height: 20px;"></td><td style="padding: 0 5px;">plate</td></tr> </table> |  | 1/2 |  | spoon |  | 1 |  | glass |  | 2 |  | bowl |  | 3 |  | plate |
|           | 1/2                                                                                                                                                                                                                                                                            |                     | spoon                       |                             |                             |                             |                               |                                                                                                                                                                                                                                                                                                                                                                                                                                                                                                                                                                                                                                                                                                                                                                                                                                                                                                                                                                                                  |  |     |  |       |  |   |  |       |  |   |  |      |  |   |  |       |
|           | 1                                                                                                                                                                                                                                                                              |                     | glass                       |                             |                             |                             |                               |                                                                                                                                                                                                                                                                                                                                                                                                                                                                                                                                                                                                                                                                                                                                                                                                                                                                                                                                                                                                  |  |     |  |       |  |   |  |       |  |   |  |      |  |   |  |       |
|           | 2                                                                                                                                                                                                                                                                              |                     | bowl                        |                             |                             |                             |                               |                                                                                                                                                                                                                                                                                                                                                                                                                                                                                                                                                                                                                                                                                                                                                                                                                                                                                                                                                                                                  |  |     |  |       |  |   |  |       |  |   |  |      |  |   |  |       |
|           | 3                                                                                                                                                                                                                                                                              |                     | plate                       |                             |                             |                             |                               |                                                                                                                                                                                                                                                                                                                                                                                                                                                                                                                                                                                                                                                                                                                                                                                                                                                                                                                                                                                                  |  |     |  |       |  |   |  |       |  |   |  |      |  |   |  |       |

**Supplementary materials**  
**Bensaada et al.**

Supplementary material S2: Calculation of IFS and HIS

| Hair                 |                 |                  |                 |  |   | Multiplying factor |
|----------------------|-----------------|------------------|-----------------|--|---|--------------------|
| Length               | Short<br>0,5    | Medium<br>0,2    | Long<br>0,1     |  | A | a = A + B + C      |
| Frequency of cutting | <2 month<br>0,5 | <4 month<br>0,2  | >4 month<br>0,1 |  | B |                    |
| Treatments           | Shampoo<br>0,5  | Colouring<br>0,2 | Perm<br>0,1     |  | C |                    |

| Dietary tendencies          |                   |                    |  |  |       | Multiplying factor |
|-----------------------------|-------------------|--------------------|--|--|-------|--------------------|
| Big eater<br>1,5            | Medium eater<br>1 | Small eater<br>0,5 |  |  | D     | b = D              |
| Diet duration (months)<br>E |                   | Hair length<br>F   |  |  | G=E/F | c = a + b          |

|                            |                             |                              |                        |                 |   |
|----------------------------|-----------------------------|------------------------------|------------------------|-----------------|---|
| Vegan<br>1                 | Vegetarian<br>0,8           | Lactovegetarian<br>0,8       | Flexitarian<br>0,5     | Omnivore<br>0,2 | a |
| Asian<br>1                 | Exotic<br>0,8               | Gluten free<br>0,2           | Lactose free<br>0      | Other           | b |
| Wok/Oven<br>1              | Vapor<br>0,8                | Grill<br>0,5                 | Frying<br>0,2          | Boiling<br>0    | c |
| Ultratransformed<br>1      | Industrial<br>0,5           | Home-made<br>0,2             |                        |                 | d |
| Canteen >3 times/week<br>1 | Fast food >2times /w<br>0,8 | Restaurant > 2times/w<br>0,5 | Home > 3times/w<br>0,2 |                 | e |



**Supplementary materials**  
**Bensaada et al.**

Supplementary material S2: Calculation of IFS and HIS (continue)

**Soy-consumption**

|                                      |                  |                      |                      |            |   |                                           |
|--------------------------------------|------------------|----------------------|----------------------|------------|---|-------------------------------------------|
| Soy juice                            | Every day<br>2   | > once a week<br>1   | < once a week<br>0,5 | never<br>0 | f |                                           |
| Soy yogurt                           | Every day<br>0,8 | > once a week<br>0,3 | < once a week<br>0,1 | never<br>0 | g |                                           |
| Soy cream and icecream               | Every day<br>2   | > once a week<br>1   | < once a week<br>0,5 | never<br>0 | h |                                           |
| Soy cheese and tofu                  | Every day<br>1   | > once a week<br>0,5 | < once a week<br>0,2 | never<br>0 | i |                                           |
| Other plant juices                   | Every day<br>0   | > once a week<br>0   | < once a week<br>0   | never<br>0 | j |                                           |
| Other soy products (miso, tempeh...) | Every day<br>2   | > once a week<br>1   | < once a week<br>0,5 | never<br>0 | k |                                           |
| Meat based dishes                    | Every day<br>0,2 | > once a week<br>0,1 | < once a week<br>0   | never<br>0 | l | If Canteens, increased to the upper level |
| Fish based dishes                    | Every day<br>0,2 | > once a week<br>0   | < once a week<br>0   | never<br>0 | m | If Canteens, increased to the upper level |
| Vegetables based dishes              | Every day<br>0,4 | > once a week<br>0,2 | < once a week<br>0   | never<br>0 | n | If Canteens, increased to the upper level |
| Pizzas                               | Every day<br>0,1 | > once a week<br>0   | < once a week<br>0   | never<br>0 | o | If Canteens, increased to the upper level |
| Elaborated dishes                    | Every day<br>0,3 | > once a week<br>0,1 | < once a week<br>0   | never<br>0 | p | If Canteens, increased to the upper level |
| Canned recipes                       | Every day<br>0,2 | > once a week<br>0,1 | < once a week<br>0   | never<br>0 | q | If Canteens, increased to the upper level |
| Nuggets                              | Every day<br>0,2 | > once a week<br>0,1 | < once a week<br>0   | never<br>0 | r | If soy increased to the upper level       |
| Hamburgers / Kebabs                  | Every day<br>0,5 | > once a week<br>0,2 | < once a week<br>0,1 | never<br>0 | s | If soy increased to the upper level       |
| Meat balls                           | Every day<br>0,5 | > once a week<br>0,2 | < once a week<br>0,1 | never<br>0 | t | If soy increased to the upper level       |

**Supplementary materials**  
**Bensaada et al.**

Supplementary material S2: Calculation of IFS and HIS (continue)

|                                            |                         |                      |                      |            |    |                                           |
|--------------------------------------------|-------------------------|----------------------|----------------------|------------|----|-------------------------------------------|
| Escalope cordon bleu                       | Every day<br>0,2        | > once a week<br>0,1 | < once a week<br>0   | never<br>0 | u  | If soy increased to the upper level       |
| Stuffed vegetables (tomatoes, cabbages...) | Every day<br>0,2        | > once a week<br>0,1 | < once a week<br>0   | never<br>0 | v  | If Canteens, increased to the upper level |
| Frozen minced steaks                       | Every day<br>0,5        | > once a week<br>0,2 | < once a week<br>0,1 | never<br>0 | w  | If Canteens, increased to the upper level |
| Industrial biscuits                        | Every day<br>0,15       | > once a week<br>0,1 | < once a week<br>0   | never<br>0 | x  | If Canteens, increased to the upper level |
| Other legumes                              | Every day<br>0,2        | > once a week<br>0,1 | < once a week<br>0   | never<br>0 | y  |                                           |
| Chick peas                                 | Every day<br>0,2        | > once a week<br>0,1 | < once a week<br>0   | never<br>0 | z  |                                           |
| Soy seeds                                  | Every day<br>3          | > once a week<br>2   | < once a week<br>1   | never<br>0 | aa |                                           |
| soybean sprouts                            | Every day<br>0,5        | > once a week<br>0,2 | < once a week<br>0,1 | never<br>0 | ba |                                           |
| Alfalfa or clover sprouts                  | Every day<br>3          | > once a week<br>2   | < once a week<br>1   | never<br>0 | ca |                                           |
| Food supplements                           | Soy/Alfalfa/Clover<br>1 | Others<br>0          | None<br>0            |            | da |                                           |

**Isoflavone Food Score (IFS)**

$$\text{IFS} = \text{SUM}(a:da) * c$$

**Isoflavone Hair Score (IHS)**

$$\text{IHS} = \text{IFS} * G$$

Supplementary materials  
Bensaada et al.

Supplementary material S3: Evidencing a Questionable Answer to the Food Questionnaire

A

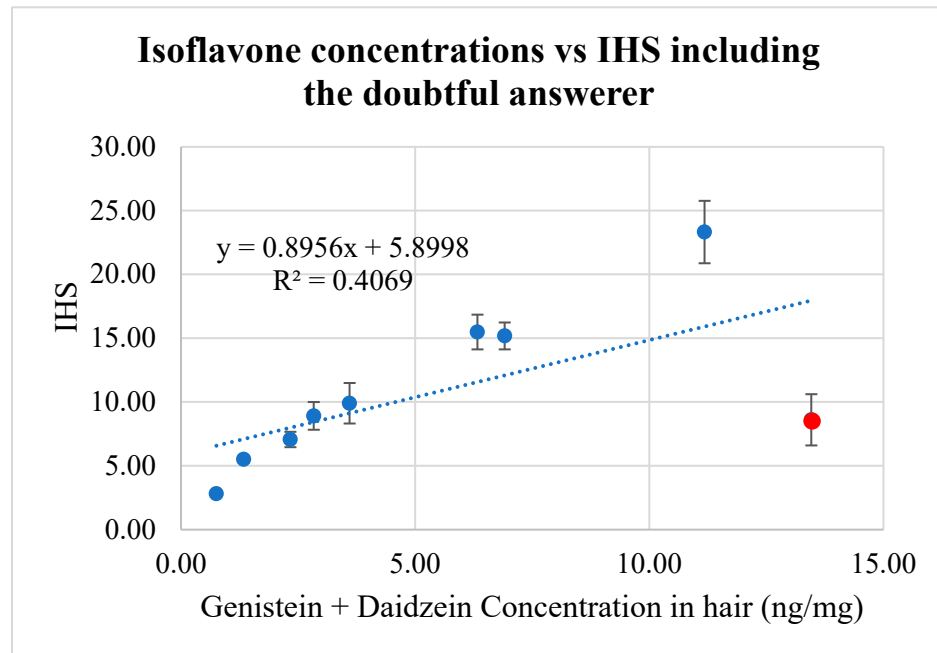

N= 9; r = 0.638 p<0.1

B

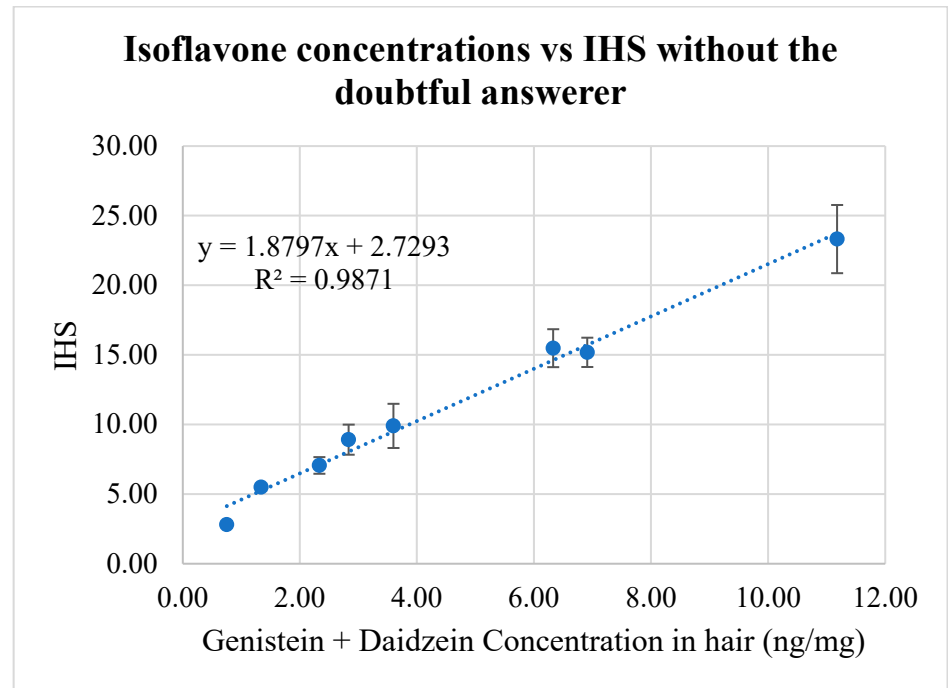

N = 8; r = 0.993 p<0.001

Supplementary materials  
Bensaada et al.

Supplementary material S4: Pearson Regression Correlation Between Individual Isoflavones and IHS

A

**Correlation of Genistein hair level with IHS**

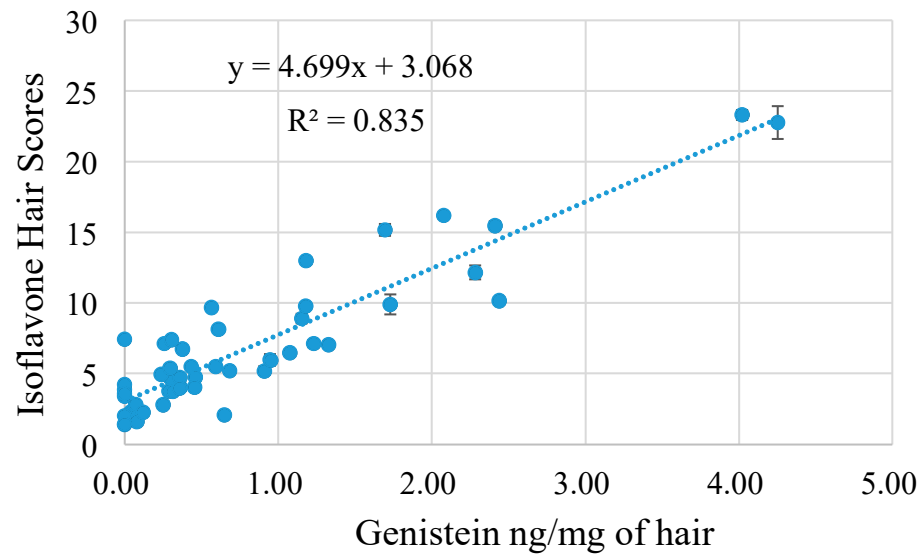

$N = 60$ ;  $r_G = 0.914$   $p < 0.001$

B

**Correlation of Daidzein hair level with IHS**

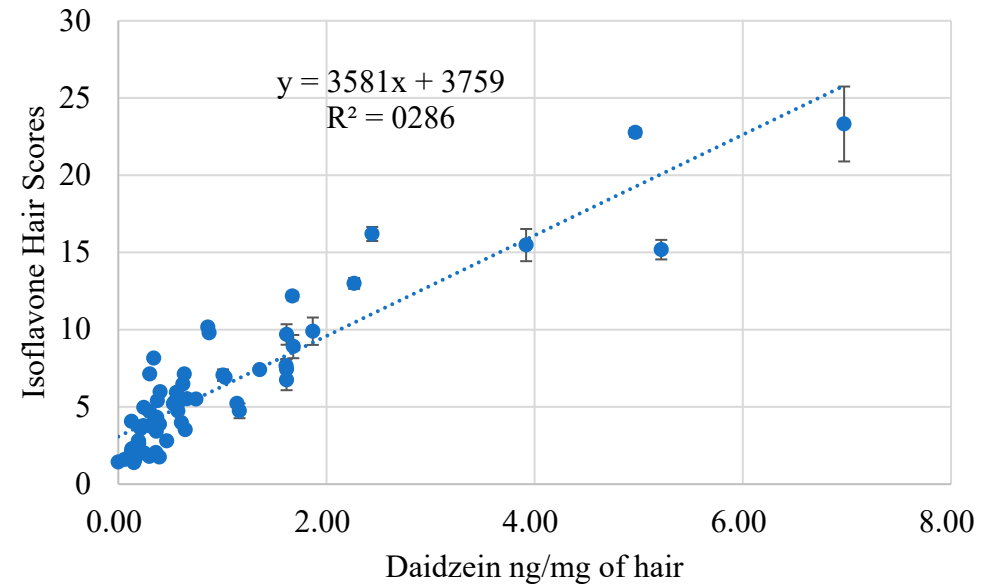

$N = 60$ ;  $r_D = 0.91$ ;  $p < 0.001$
